# Supplementary material
Source: publisher site journal article supplement (https://www.dovepress.com/article/578529)
Supplement: Supplementary file 1 [file 578529%20Revised%20%252509Supplementary%20File-.docx]

| Table S1 Expression of drug-resistance related genes in *E. coli.* | | | | | | |
| --- | --- | --- | --- | --- | --- | --- |
| GeneName | SAC | SUC | ACE-K | CYC | ASP | GLC |
| *folA* | 468.50918 | 596.4743 | 642.54511 | 858.66708 | 593.36005 | 151.69561 |
| *acrB* | 215.46584 | 240.16284 | 215.16872 | 248.05938 | 236.78818 | 99.066521 |
| *acrA* | 249.61439 | 246.24451 | 247.89388 | 294.85218 | 293.28283 | 178.59354 |
| *acrR* | 209.06255 | 203.92284 | 205.35342 | 219.58858 | 226.96832 | 216.70801 |
| *mdfA* | 76.910604 | 96.454014 | 75.64694 | 146.245 | 88.988624 | 71.708735 |
| *msbA* | 406.64998 | 386.57894 | 415.25629 | 427.82563 | 339.03428 | 44.605423 |
| *ompF* | 906.88226 | 958.60588 | 968.4142 | 869.59332 | 972.18546 | 109.84649 |
| *ompA* | 5776.7779 | 5676.2246 | 4944.6764 | 4881.9236 | 5559.3691 | 3377.3975 |
| *mdtJ* | 270.20478 | 300.86976 | 231.058 | 284.88174 | 188.16578 | 127.89325 |
| *mdtK* | 159.72744 | 136.24539 | 140.29369 | 141.95058 | 140.17382 | 132.48525 |
| *ompC* | 4416.3556 | 4309.9757 | 3871.7173 | 3894.4463 | 4399.4497 | 843.27684 |
| *arnC* | 197.12722 | 188.64441 | 179.67905 | 232.92753 | 145.75763 | 112.715 |
| *arnA* | 159.17852 | 148.82357 | 131.70121 | 147.84341 | 120.08179 | 62.946957 |
| *evgA* | 715.91177 | 768.14252 | 630.91762 | 827.75107 | 706.05338 | 380.56042 |
| *evgS* | 881.66461 | 866.79122 | 905.2173 | 939.96706 | 840.21043 | 817.62957 |
| *acrD* | 60.471042 | 61.530475 | 55.911688 | 68.936021 | 67.846848 | 56.786686 |
| *stpA* | 1699.2604 | 1791.802 | 1753.3728 | 1883.9186 | 1345.9582 | 6498.0299 |
| *proV* | 737.61023 | 518.09623 | 721.57749 | 675.02388 | 400.7321 | 194.55084 |
| *emrB* | 61.618437 | 50.80183 | 53.333305 | 55.793832 | 44.748976 | 40.553547 |
| *tolC* | 867.49957 | 882.72996 | 771.1884 | 888.96129 | 903.41007 | 435.17075 |
| *acrE* | 51.474884 | 60.859873 | 59.067326 | 66.735783 | 36.288052 | 49.404936 |
| *acrF* | 80.716325 | 71.63898 | 70.092189 | 80.197569 | 70.299092 | 56.951285 |
| *ompR* | 707.46768 | 625.53331 | 730.63597 | 580.96324 | 645.23852 | 483.98123 |
| *feoA* | 29.708889 | 14.489254 | 5.4545425 | 32.280717 | 15.358759 | 114.05685 |
| *feoB* | 725.20397 | 727.48287 | 656.09549 | 761.25216 | 713.32902 | 1016.9038 |
| *mdtE* | 362.66395 | 372.76672 | 343.66444 | 270.12103 | 381.02454 | 363.79998 |
| *mdtF* | 316.71164 | 370.24372 | 346.65247 | 331.68074 | 385.71496 | 225.47655 |
| *eptB* | 262.61815 | 281.80401 | 291.79868 | 328.41623 | 276.6392 | 248.98368 |
| *cpxA* | 273.11421 | 314.96728 | 279.68226 | 291.93609 | 279.49811 | 170.33818 |
| *cpxR* | 773.29816 | 808.16459 | 939.39864 | 780.92551 | 688.00208 | 647.33381 |
| *arcA* | 2868.1633 | 3366.5186 | 2884.4716 | 2730.4895 | 3107.8245 | 1146.1043 |

Table S2 Expression of drug-resistance related genes in *B. subtilis.*

| GeneName | SAC | CYC | SUC | ACE-K | ASP | GLC |
| --- | --- | --- | --- | --- | --- | --- |
| *murAA* | 5520.0824 | 4348.1984 | 4999.0138 | 5399.4982 | 4967.8227 | 2667.2034 |
| *murAB* | 271.91584 | 251.85914 | 301.86067 | 267.24012 | 225.49999 | 209.14322 |
| *degU* | 1869.1573 | 2140.3049 | 1722.1992 | 1355.3202 | 1533.0434 | 983.44159 |
| *ddlA* | 1049.4527 | 845.87261 | 855.39479 | 1010.9564 | 955.99291 | 726.20812 |
| *sufC* | 412.33689 | 685.79617 | 323.57702 | 876.57998 | 1042.9961 | 690.66127 |
| *srfP* | 279.07459 | 666.17752 | 267.45742 | 270.38029 | 486.93176 | 283.6485 |
| *pbuE* | 420.57691 | 569.60118 | 437.10367 | 390.20155 | 557.7042 | 190.5538 |
| *oppF* | 681.3945 | 651.53399 | 638.62282 | 756.67199 | 308.87707 | 65.012931 |
| *mdtP* | 50.855697 | 68.11856 | 60.091815 | 49.839834 | 94.872382 | 32.682283 |
| *lmrB* | 83.35823 | 35.894697 | 77.832157 | 83.076279 | 67.336803 | 14.193748 |
| *lmrA* | 4.7045209 | 5.68951 | 5.0684351 | 4.5373629 | 18.137859 | 1.4419045 |

Table S3 Expression of oxidative stress related genes in *E. coli.*

| GeneName | SAC | CYC | SUC | ACE-K | ASP | GLC |
| --- | --- | --- | --- | --- | --- | --- |
| *recR* | 415.8068 | 382.5744 | 272.5701 | 391.971 | 354.4173 | 77.24246 |
| *tpx* | 2501.031 | 2172.677 | 2415.219 | 2855.211 | 2521.018 | 666.7939 |
| *ruvB* | 289.4369 | 256.0107 | 264.6761 | 260.7822 | 296.7233 | 138.8989 |
| *ruvA* | 571.1097 | 659.4339 | 552.391 | 652.2991 | 583.6328 | 322.9374 |
| *yfgD* | 316.1026 | 483.8521 | 296.7077 | 407.6361 | 337.2101 | 86.68321 |
| *sodA* | 562.8328 | 371.3582 | 448.6302 | 326.4293 | 374.0513 | 226.1301 |
| *katG* | 314.9224 | 343.6468 | 344.3407 | 321.6004 | 383.7366 | 174.0818 |
| *oxyR* | 354.1766 | 351.4308 | 301.0861 | 319.7146 | 303.896 | 73.6524 |
| *soxS* | 777.7127 | 2343.54 | 1515.826 | 2905.655 | 2035.51 | 160.5245 |
| *yebK* | 255.3735 | 228.4139 | 185.8306 | 230.3625 | 207.9611 | 89.67228 |
| *hupA* | 1166.156 | 1437.852 | 1120.639 | 1222.192 | 1137.336 | 304.8201 |
| *lexA* | 2317.937 | 2030.346 | 2178.915 | 1674.377 | 1550.604 | 486.7924 |
| *rlmN* | 416.3874 | 461.4483 | 388.7035 | 505.5356 | 407.2797 | 54.03628 |

Table S4 Expression of oxidative stress related genes in *B. subtilis.*

| GeneName | SAC | CYC | SUC | ACE-K | ASP | GLC |
| --- | --- | --- | --- | --- | --- | --- |
| *mfd* | 72.4608 | 58.50409 | 79.28573 | 68.7942 | 70.25726 | 66.85761 |
| *veg* | 9760.259 | 16536.42 | 16180.28 | 16116.24 | 15102.58 | 14857.04 |
| *sodA* | 7770.246 | 6535.31 | 6736.212 | 6822.473 | 5893.553 | 7038.668 |
| *dps* | 2825.806 | 4787.833 | 3487.274 | 3629.952 | 2770.62 | 1065.814 |
| *soxS* | 145.7328 | 102.1307 | 184.8296 | 172.5798 | 142.243 | 73.50123 |
| *rlmN* | 195.2665 | 185.5298 | 173.0341 | 142.001 | 126.4667 | 98.256 |

Table S5 Expression of virulence related related genes in *E. coli.*

| GeneName | SAC | CYC | SUC | ACE-K | ASP | GLC |
| --- | --- | --- | --- | --- | --- | --- |
| *rstA* | 1166.569 | 1449.853 | 1246.478 | 1219.454 | 1176.993 | 86.68321 |
| *rstB* | 447.4131 | 502.3832 | 469.9453 | 539.8466 | 426.7423 | 91.87621 |
| *rpoS* | 619.381 | 644.8341 | 696.4181 | 668.7829 | 713.5249 | 335.21 |
| *nhaA* | 811.4422 | 712.6653 | 770.9227 | 711.8669 | 717.1632 | 311.9704 |
| *luxS* | 399.0664 | 484.9615 | 431.0834 | 453.1076 | 447.9043 | 151.1916 |
| *lpxD* | 620.5857 | 610.9425 | 486.195 | 626.6663 | 572.256 | 228.1137 |
| *bamA* | 848.5826 | 800.1319 | 864.0193 | 887.3619 | 860.2167 | 175.2903 |
| *slyB* | 6356.788 | 6371.855 | 6597.688 | 5487.41 | 6083.25 | 2878.327 |
| *bamE* | 768.4699 | 839.2986 | 798.5189 | 719.9996 | 750.8727 | 745.1714 |
| *secG* | 724.1475 | 1005.646 | 929.2268 | 933.6604 | 911.3786 | 249.8975 |
| *slyD* | 2102.002 | 2465.788 | 2198.64 | 2177.941 | 2200.227 | 378.414 |
| *blc* | 93.86674 | 57.42824 | 96.92063 | 74.52499 | 91.80741 | 87.65717 |
| *tatD* | 166.0966 | 191.1282 | 208.1419 | 239.8327 | 175.9098 | 106.2783 |
| *phoP* | 899.1183 | 863.5768 | 740.2593 | 903.5719 | 892.8193 | 806.8321 |

Table S6 Expression of virulence related related genes in *B. subtilis.*

| GeneName | SAC | CYC | SUC | ACE-K | ASP | GLC |
| --- | --- | --- | --- | --- | --- | --- |
| *purA* | 1259.464 | 1444.83 | 1494.689 | 1857.387 | 1308.956 | 635.4584 |
| *phoP* | 145.7328 | 102.1307 | 184.8296 | 172.5798 | 142.243 | 73.50123 |
| *codY* | 819.048 | 861.4727 | 895.3001 | 991.1433 | 681.844 | 353.2278 |
| *purB* | 294.3266 | 923.0065 | 258.3318 | 348.3844 | 287.9385 | 170.9558 |
| *bslA* | 41.52644 | 72.09961 | 73.68725 | 84.81378 | 69.96031 | 38.93142 |
| *clpX* | 3793.162 | 3882.294 | 3737.309 | 3359.971 | 3512.972 | 2840.422 |
| *spo0A* | 661.8892 | 918.4144 | 600.4961 | 611.1726 | 568.297 | 423.1798 |
| *spo0B* | 257.993 | 316.8029 | 270.5047 | 306.5894 | 304.4905 | 141.2021 |
| *spoIIAA* | 201.7253 | 187.7301 | 113.6532 | 207.1229 | 49.80226 | 23.09491 |
